# Supplementary material
Source: MDPI journal article supplement (https://www.mdpi.com/2076-3417/11/6/2663)
Supplement: s1 [file s1]

## Sheet: Sheet1
Reviewer	name	structure	extracted	missing	incorrect	near/split-up	correct			Reviewer 1
Reviewer 1	abacavir	structured text	13	3	1	0	12			Confusion matrix
Reviewer 1	abiraterone	tabular text	25	0	0	0	25				110	8
Reviewer 1	acamprosate	structured text	13	0	0	3	10				11	0
Reviewer 1	acarbose	tabular text	15	0	1	0	14
Reviewer 1	acetazolamide	free text	52	8	3	0	49			accuracy	precision	recall
Reviewer 2	Adempas	tabular text	21	0	0	1	20			0.853	0.932	0.909
Reviewer 2	Afinitor	tabular text	76	0	0	4	72
Reviewer 2	Aubagio	structured text	59	0	0	1	58
Reviewer 2	BOSULIF	tabular text	71	0	0	20	51
Reviewer 2	Brintellix	tabular text	14	1	1	0	13
Reviewer 2	CAPRELSA	tabular text	111	0	0	4	107
Reviewer 2	Edarbi	tabular text	11	2	0	0	11			Reviewer 2
Reviewer 2	ELIQUIS	tabular text	41	0	0	5	36			Confusion Matrix
Reviewer 2	Esbriet	tabular text	20	0	0	12	8				1590	116
Reviewer 2	Fycompa	tabular text	24	1	0	1	23				7	0
Reviewer 2	Harvoni	tabular text	5	0	1	0	4
Reviewer 2	Iclusig	tabular text	145	0	0	0	145			accuracy	precision	recall
Reviewer 2	INLYTA	structured text	64	0	4	1	59			0.928	0.932	0.996
Reviewer 2	Intelence	tabular text	79	0	0	0	79
Reviewer 2	INVOKANA	tabular text	28	0	2	0	26
Reviewer 2	Jardiance	tabular text	17	0	0	2	15
Reviewer 2	Kalydeco	tabular text	26	0	0	0	26
Reviewer 2	Latuda	tabular text	78	0	2	2	74
Reviewer 2	Mekinist	tabular text	137	0	0	0	137			Totals: reviewer 1 + reviewer 2
Reviewer 2	Multaq	tabular text	27	0	2	3	22			Confusion matrix
Reviewer 2	Otezla	tabular text	24	1	3	0	21				1700	124
Reviewer 2	SABRIL	free text	48	0	4	1	43				18	0
Reviewer 2	Sirturo	tabular text	9	0	0	0	9
Reviewer 2	SIVEXTRO	tabular text	73	0	0	0	73			accuracy	precision	recall
Reviewer 2	Stivarga	tabular text	58	0	0	2	56			0.923	0.932	0.99
Reviewer 2	Toviaz	structured text	21	0	0	10	11
Reviewer 2	Vimpat	tabular text	60	0	0	1	59
Reviewer 2	VOTRIENT	structured text	129	0	0	6	123
Reviewer 2	Xarelto	structured text	61	0	0	15	46
Reviewer 2	XELJANZ	tabular text	78	0	0	0	78
Reviewer 2	Zelboraf	tabular text	66	2	1	4	61
Reviewer 2	Zytiga	tabular text	25	0	1	0	24
